# Supplementary material
Source: MDPI journal article supplement (https://www.mdpi.com/2037-0164/14/1/19)
Supplement: s1 [file s1]

Supplementary Materials

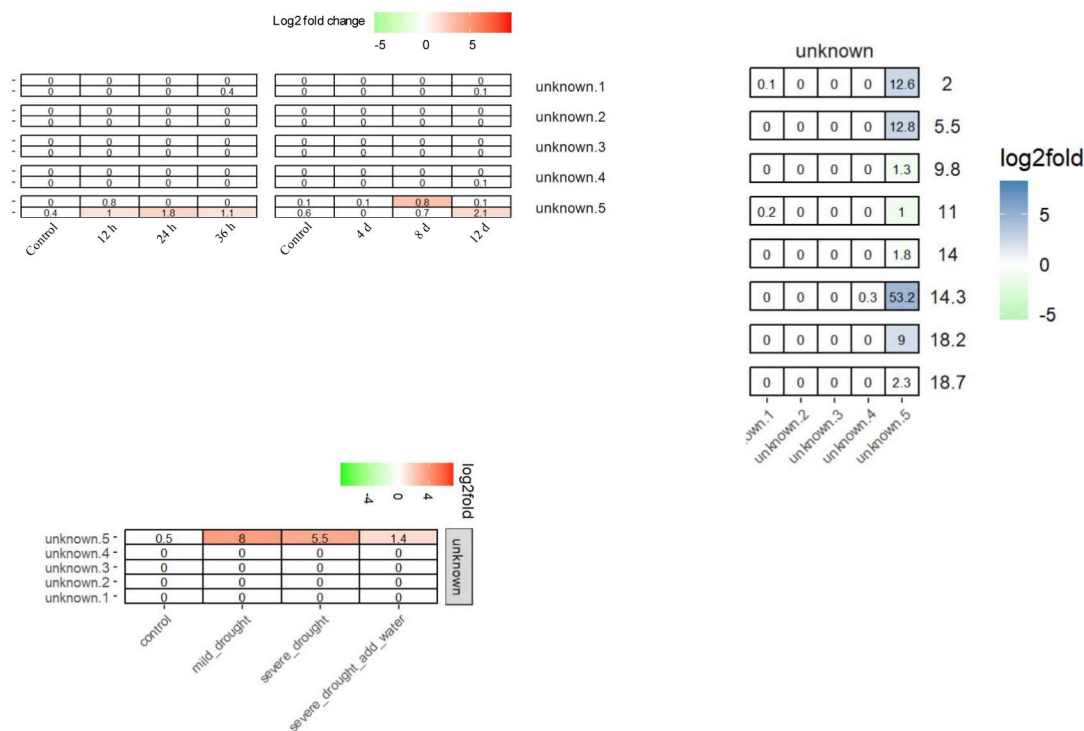

Figure S1. Expression analysis of short-/long-term drought stress with five unknown genes ,T:Drought tolerant cultivars of *C. oleifera* , S: Drought sensitive cultivars of *C. oleifera*, long-term :0 d to 12 d, short-term :0 to 36 h. (A) Expression analysis of mild, severe drought stress and severe drought add water with five unknown genes. (B) Expression analysis of wild *C. oleifera* cultivars grown in different location and elevation with five unknown genes , (2) - (18.7): Temperature. (C)

**Table S1.** The Molecular weight (MW) and isoelectric point (*pI*) of 51 CoDREBs.

| <b>Symbol</b> | <b>MW(kDa)</b> | <b><i>pI</i></b> |
|---------------|----------------|------------------|
| CoDREB1.1     | 27.46491       | 4.95             |
| CoDREB1.2     | 31.21217       | 5.24             |
| CoDREB1.3     | 26.61236       | 5.50             |
| CoDREB1.4     | 22.94886       | 7.11             |
| CoDREB1.5     | 31.77895       | 5.40             |
| CoDREB1.6     | 19.5049        | 9.87             |
| CoDREB1.7     | 33.5912        | 8.03             |
| CoDREB2.1     | 38.65894       | 5.23             |
| CoDREB2.2     | 25.79771       | 6.76             |
| CoDREB2.3     | 40.21645       | 5                |
| CoDREB2.4     | 43.00075       | 5.18             |
| CoDREB2.5     | 59.13375       | 4.75             |
| CoDREB2.6     | 59.60038       | 4.8              |
| CoDREB3.1     | 18.2969        | 5.02             |
| CoDREB3.2     | 34.76356       | 6.54             |
| CoDREB4.1     | 25.51739       | 5.2              |
| CoDREB4.10    | 24.69031       | 5.1              |
| CoDREB4.11    | 24.13191       | 5.2              |
| CoDREB4.12    | 20.44713       | 8.99             |
| CoDREB4.13    | 24.9273        | 5.98             |
| CoDREB4.14    | 23.505         | 4.9              |
| CoDREB4.15    | 18.9308        | 5.2              |
| CoDREB4.16    | 22.5299        | 4.62             |
| CoDREB4.17    | 9.7696         | 10.44            |
| CoDREB4.18    | 18.9477        | 4.66             |
| CoDREB4.2     | 24.8112        | 5.54             |
| CoDREB4.3     | 29.13128       | 8.24             |

|           |          |      |
|-----------|----------|------|
| CoDREB4.4 | 27.52859 | 5.45 |
| CoDREB4.5 | 27.83782 | 5.45 |
| CoDREB4.6 | 25.80641 | 5.57 |
| CoDREB4.7 | 21.60291 | 4.8  |
| CoDREB4.8 | 19.68828 | 5.26 |
| CoDREB4.9 | 22.90048 | 5.1  |
| CoDREB5.1 | 47.4233  | 6.87 |
| CoDREB5.2 | 47.44675 | 6.47 |
| CoDREB5.3 | 46.75718 | 4.97 |
| CoDREB5.4 | 17.49842 | 7.96 |
| CoDREB5.5 | 16.4766  | 9.3  |
| CoDREB5.6 | 19.297   | 7.7  |
| CoDREB6.1 | 36.16312 | 7.74 |
| CoDREB6.2 | 37.36409 | 5.99 |
| CoDREB6.3 | 33.41533 | 6.18 |
| CoDREB6.4 | 33.0195  | 8.56 |
| CoDREB6.5 | 31.5752  | 8.19 |
| CoDREB6.6 | 31.6052  | 8.19 |
| CoDREB6.7 | 44.47161 | 8.35 |

---
